# Supplementary material for: T cell transcription factor expression evolves over time in granulomas from Mycobacterium tuberculosis-infected cynomolgus macaques
Source: PubMed Central journal article supplement — Cell Rep. Author manuscript; Available in PMC 2022 Jun 6. (PMC9169877; doi:10.1016/j.celrep.2022.110826), 2022-05-17
Supplement: NIHMS1808951-supplement-1.pdf [file NIHMS1808951-supplement-1.pdf]

Cell Reports, Volume 39

## Supplemental information

**T cell transcription factor expression evolves  
over time in granulomas from *Mycobacterium  
tuberculosis*-infected cynomolgus macaques**

**Nicole L. Grant, Pauline Maiello, Edwin Klein, Philana Ling Lin, H. Jacob Borish, Jaime Tomko, L. James Frye, Alexander G. White, Denise E. Kirschner, Joshua T. Mattila, and JoAnne L. Flynn**

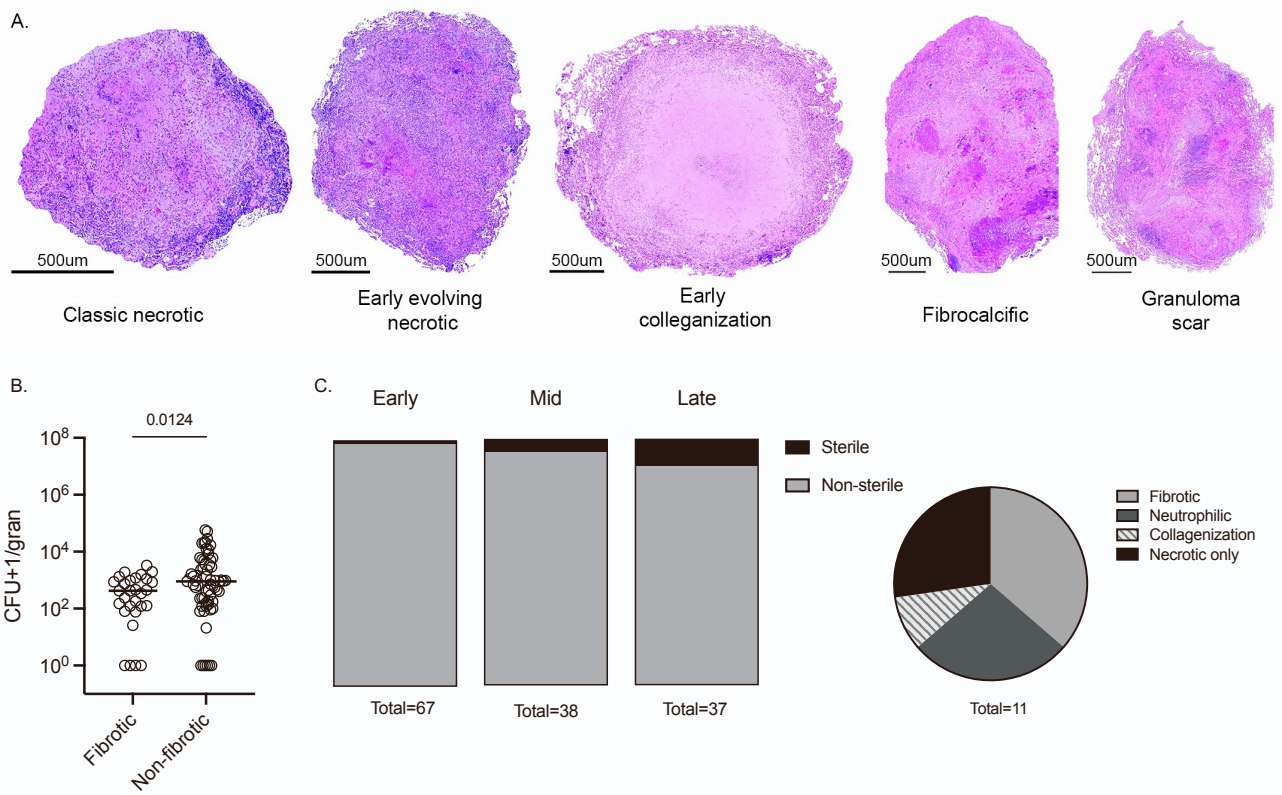

**Supplementary Figure 1: Pathology and CFU in original granulomas, Related to Figure 1.** (A) A range of granuloma pathologies is seen in original lesions across time points post-infection. (B) Individual granuloma CFU from fibrotic and non-fibrotic original granulomas isolated at mid and late time points. Statistics were performed using a Mann-Whitney test with p values noted on graph. (C) The proportion of sterile granulomas at each time point with total granuloma numbers assessed listed below (left). The proportion of fibrotic, neutrophilic, collagenic, or necrotic of the sterile granulomas from all time points (11 total)(right).

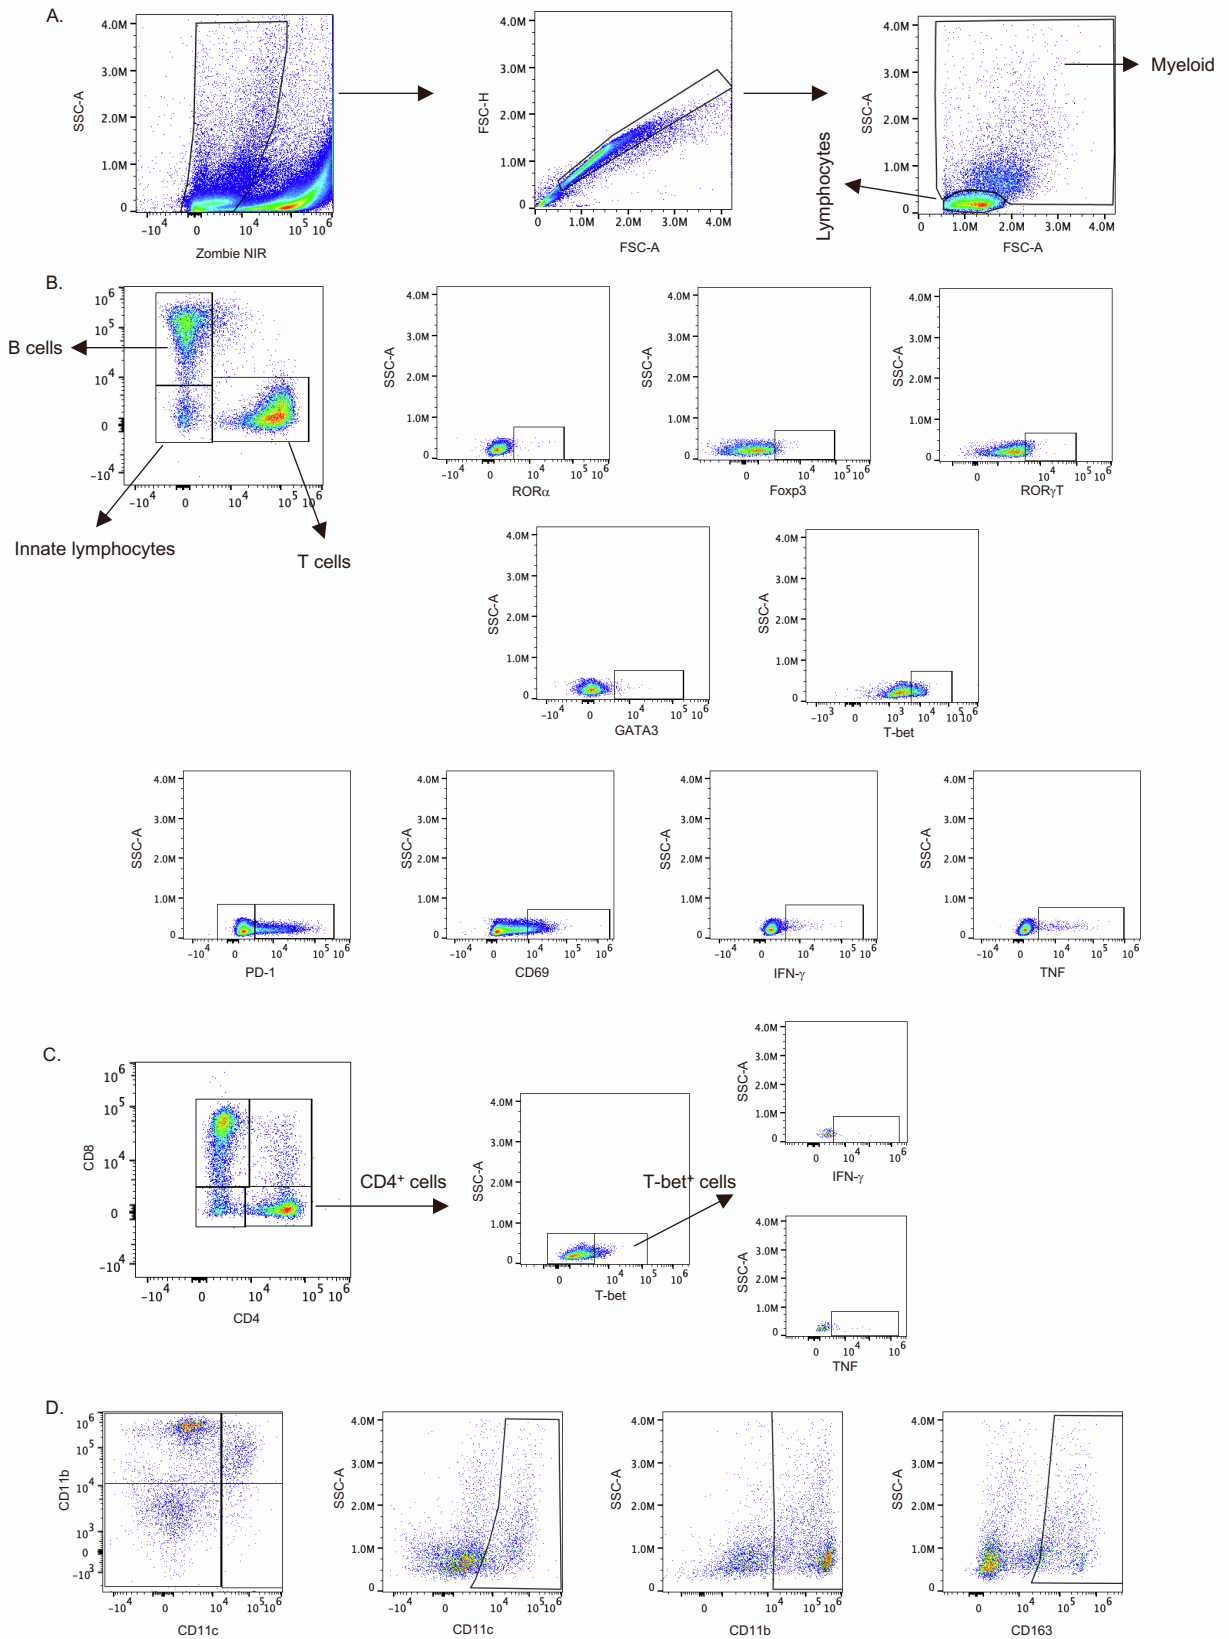

**Supplementary figure 2: Flow cytometry gating strategy for lung granulomas, Related to STAR Methods.** (A) Identification of live events, singlets, and myeloid and lymphoid populations. (B) From the lymphocyte parent gate, identification of B cells, innate lymphocytes (ILCs) and T cells using CD3<sup>+</sup> and CD20<sup>+</sup>. Examples of transcription factor, activation marker, and pro-inflammatory cytokine gating. (C) From the CD3<sup>+</sup> parent gate, identification of CD4<sup>+</sup>, CD4<sup>+</sup>CD8<sup>+</sup>, CD8<sup>+</sup>, and CD4<sup>+</sup>CD8<sup>-</sup> lymphocytes. Example of gating on transcription factor<sup>+</sup> cells versus transcription factor<sup>-</sup> cells and then gating on pro-inflammatory cytokines. (D) From the myeloid gate, an example of CD11b versus CD11c to determine single, negative, and co-expressing populations. Examples of single identification of CD11c, CD11b, and CD163 from the myeloid parent gate.

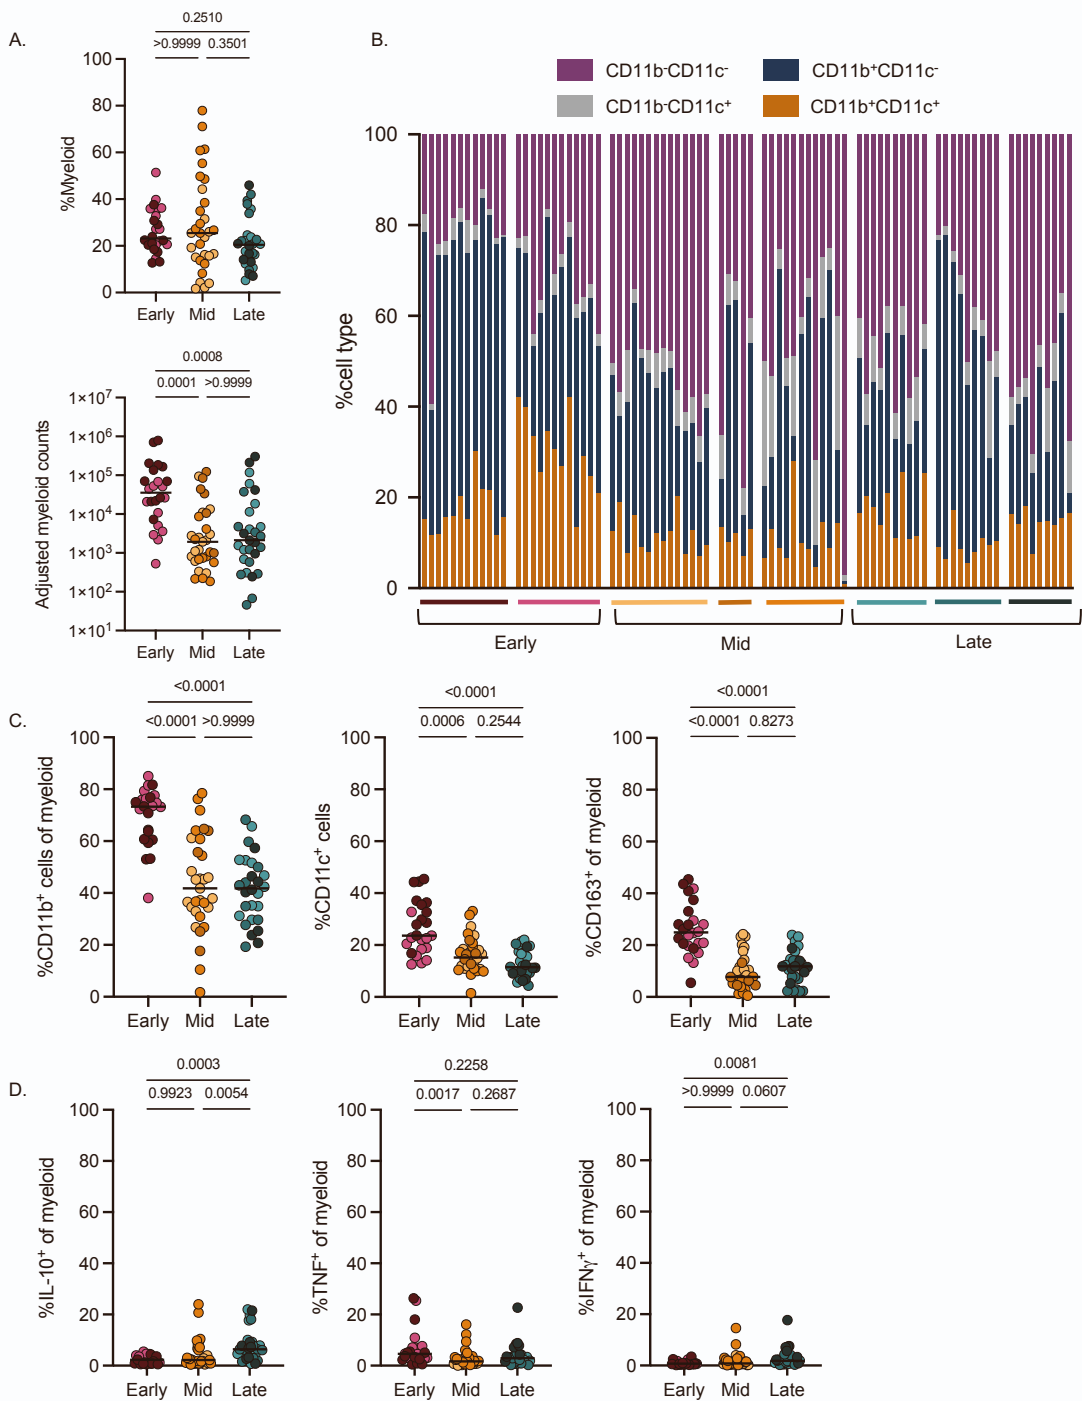

**Supplementary figure 3: Mid and late granulomas have lower proportions of CD11c<sup>+</sup> and CD11b<sup>+</sup> myeloid cells but higher levels of IL-10, Related to Figure 2.** (A) Frequency and numbers of myeloid cells in granulomas from each time point. (B) Relative frequency of the combinations of CD11c and CD11b expression in myeloid cells from each time point where each bar represents a granuloma and animals are represented by horizontal bars (Fig. 1B). (C) Frequencies of CD11b, CD11c, and CD163 expression in myeloid cells across time points. (D) Cytokine expression in myeloid cells across time points. Samples were prepared by direct ex vivo staining in the absence of in vitro stimulation. For A, C and D, individual points represent granulomas and animals are denoted by color. For A, C and D statistics, Kruskal Wallis tests were performed with Dunn's multiple comparisons-adjusted p values reported on graphs.

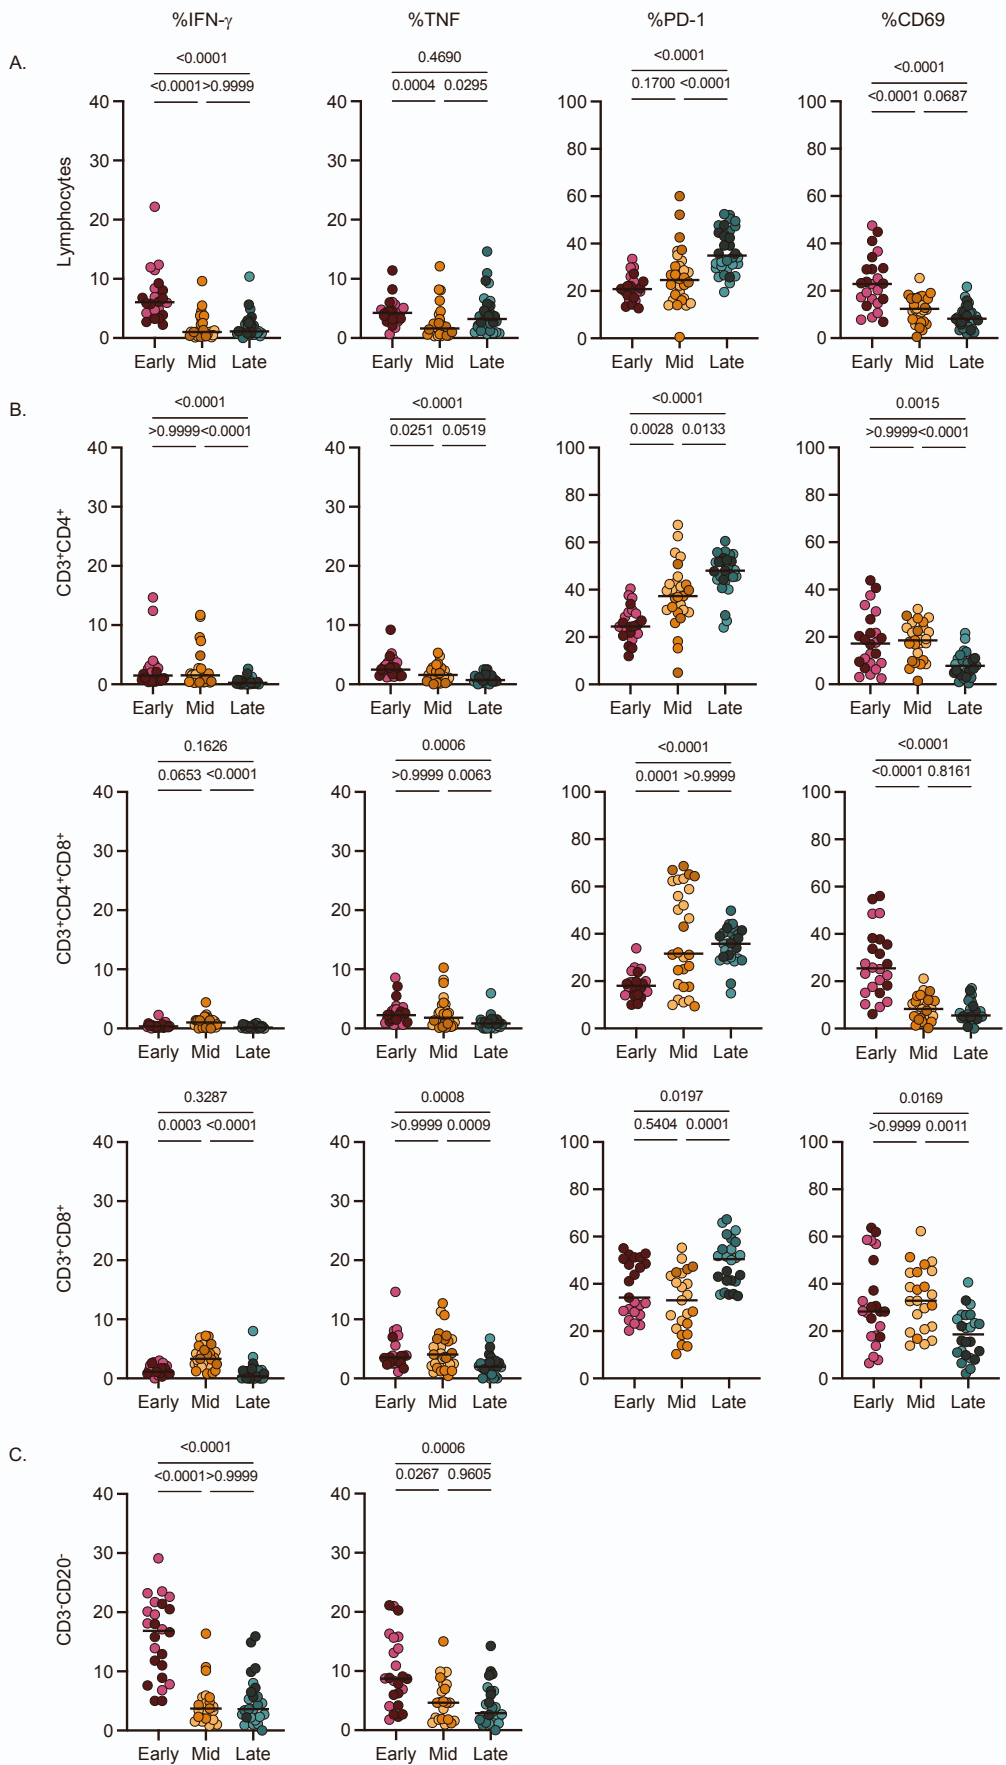

**Supplementary figure 4: Lymphocytes produce low levels of pro-inflammatory cytokines at all time points despite changes in activation marker expression, Related to Figure 2.** Pro-inflammatory cytokine and activation marker expression in (A) lymphocytes, (B) T cells: CD3<sup>+</sup>CD4<sup>+</sup>, CD3<sup>+</sup>CD4<sup>+</sup>CD8<sup>+</sup>, CD3<sup>+</sup>CD8<sup>+</sup>, and (C) CD3<sup>-</sup>CD20<sup>-</sup> cells. Samples were prepared by direct ex vivo staining in the absence of in vitro stimulation. Kruskal Wallis tests were performed with Dunn's multiple comparisons-adjusted p values reported on graphs.

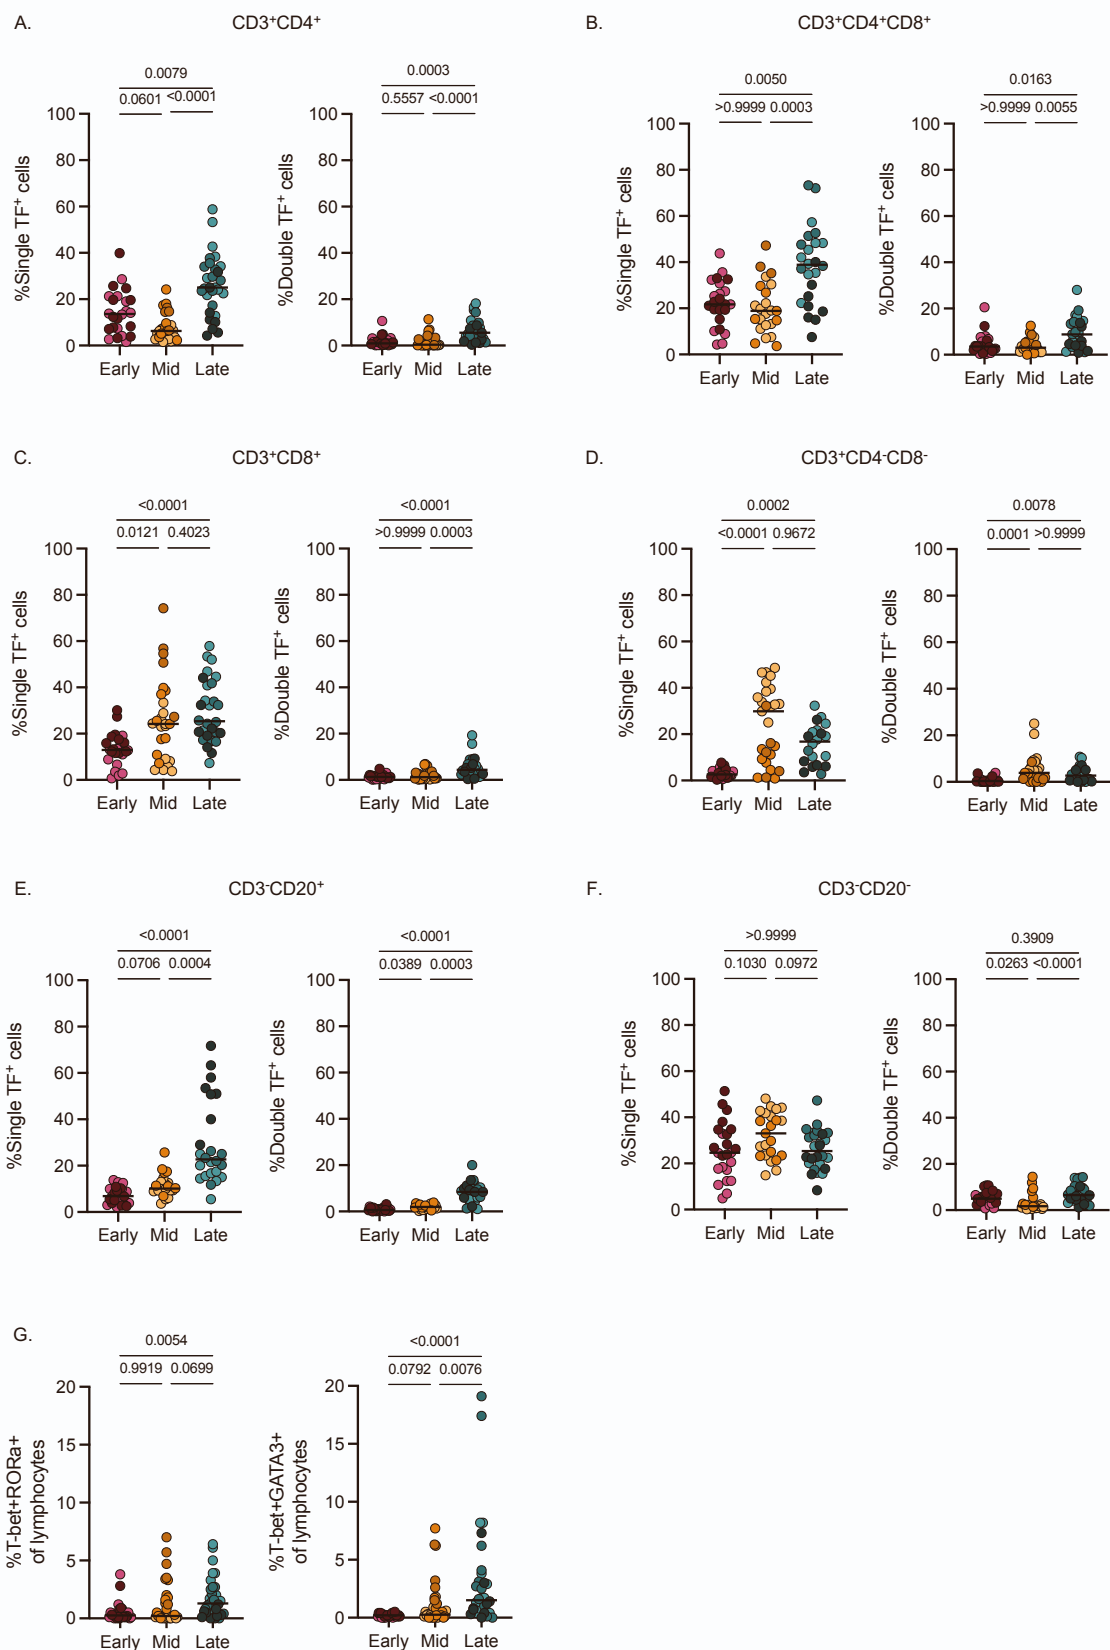

**Supplementary figure 5: Transcription factor<sup>+</sup> lymphocyte subpopulations in original granulomas over time, Related to Figure 3.** Single or double transcription factor expression in (A) CD4<sup>+</sup>, (B) CD3<sup>+</sup>CD4<sup>+</sup>CD8<sup>+</sup>, (C) CD3<sup>+</sup>CD8<sup>+</sup>, (D) CD3<sup>+</sup>CD4<sup>-</sup>CD8<sup>-</sup>, (E) CD20<sup>+</sup>, (F) CD3<sup>+</sup>CD20<sup>-</sup> cells. (G) Frequency of dual expression of T-bet and RORα (left) or T-bet and GATA3 (right) in all lymphocytes. Kruskal Wallis tests were performed with Dunn's multiple comparisons-adjusted p values reported on graphs.



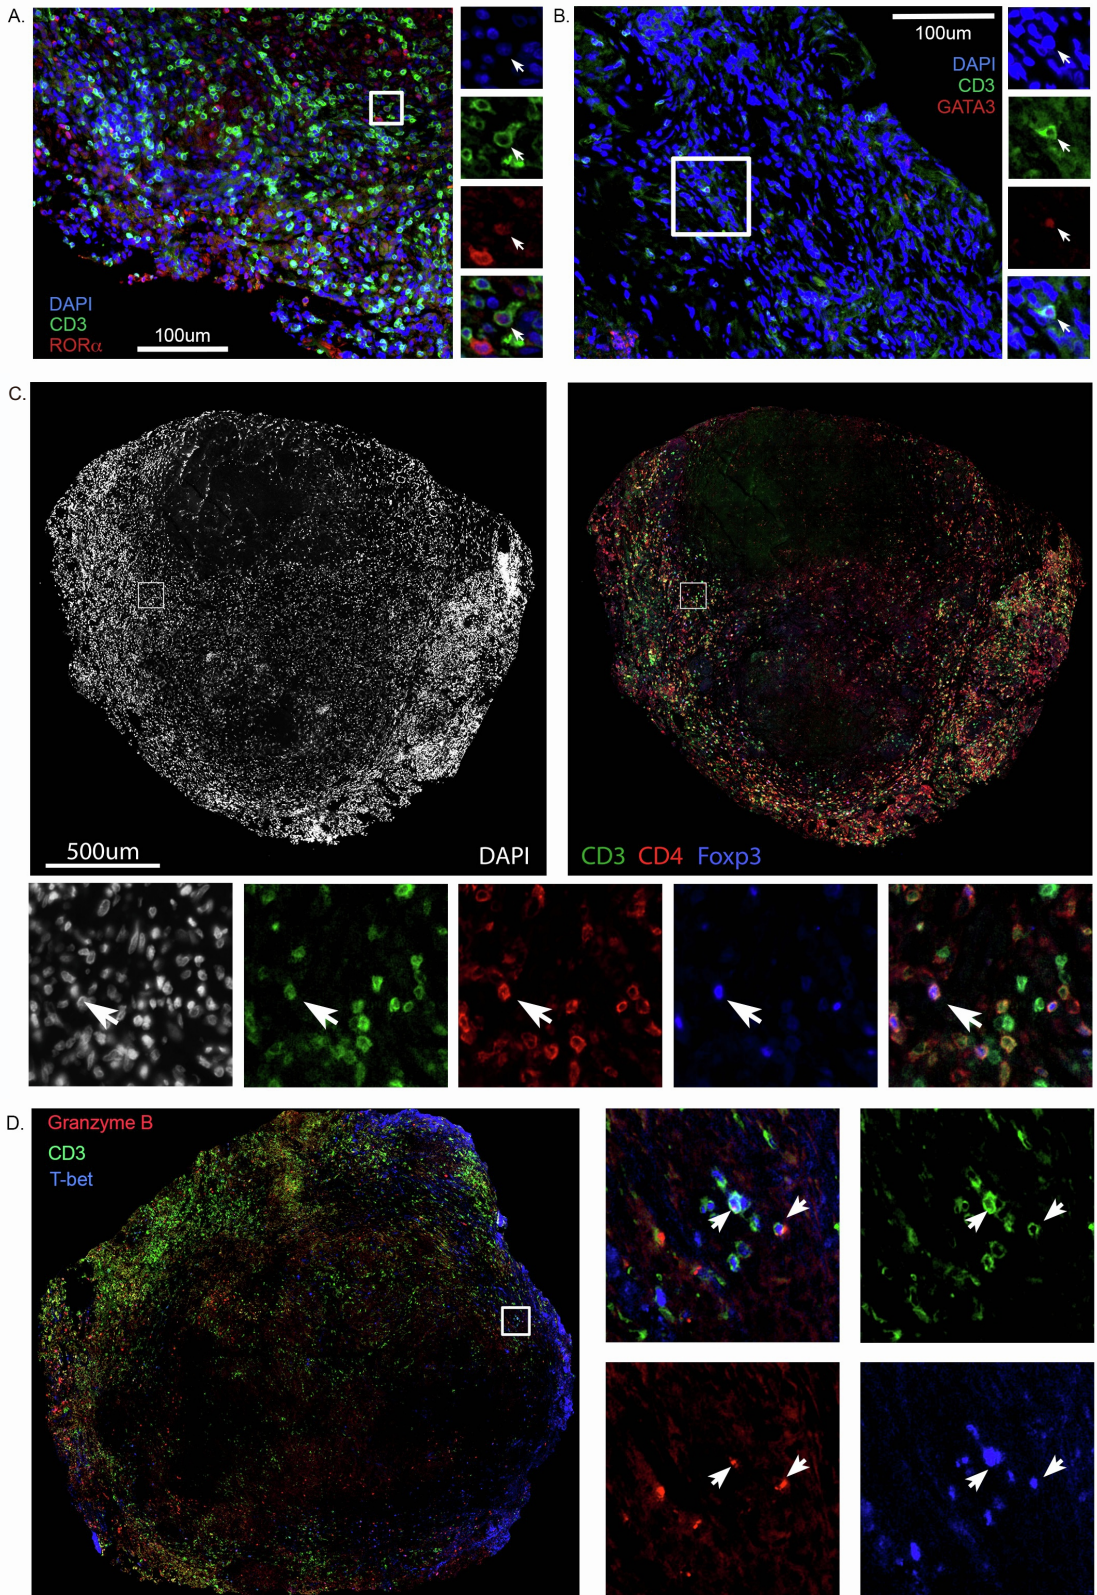

**Supplementary figure 6: Immunofluorescence staining for ROR $\alpha$ , GATA3, Foxp3, and Granzyme B in granulomas, Related to Figure 5.** (A) Immunofluorescence for ROR $\alpha$  (red, arrows in inset) in an early time point granuloma can be observed (although rare) within CD3<sup>+</sup> (green) cells. (B) Immunofluorescence for GATA3 (red, arrows in inset) in a late time point granuloma can be observed (although rare) within CD3<sup>+</sup> (green) cells. (C) Foxp3 (blue) within CD3<sup>+</sup> (green) CD4<sup>+</sup> (red) cells in a mid time point granuloma. (D) Granzyme B immunofluorescence staining in a late time point granuloma is observed within CD3<sup>+</sup> (green) T-bet<sup>+</sup> (blue) cells as indicated by arrows.

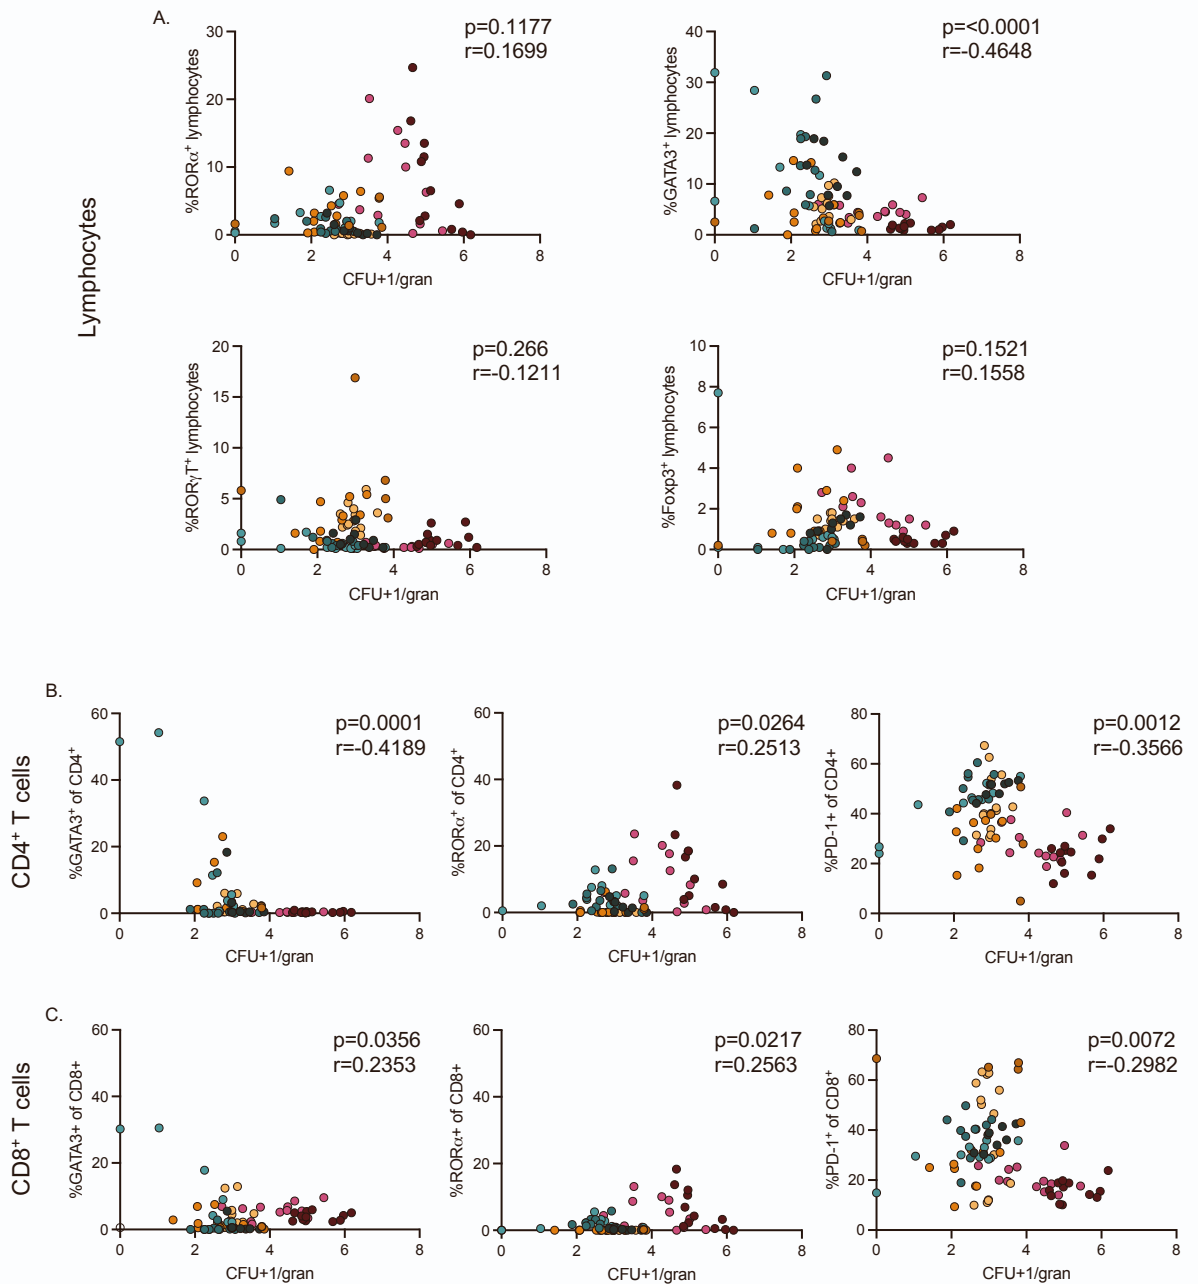

**Supplementary figure 7: Correlation analysis between CFU and frequency of lymphocyte populations, Related to Figure 7.** (A) Frequency of TF expression among all lymphocytes vs log<sub>10</sub> CFU per granuloma. (B) Frequency of TF expression or PD-1 among CD4<sup>+</sup> T cells vs log<sub>10</sub> CFU per granuloma. (C) Frequency of TF expression or PD-1 among CD8<sup>+</sup> T cells vs log<sub>10</sub> CFU per granuloma. Each individual point represents a granuloma, colored according to animal as previously established.



**Supplementary table 1: Animal and *Mtb* infection data, Related to STAR Methods.**

| Animal | Necropsy group | Necropsy time point | CFU @ infection | Date of infection | Date of Necropsy | # Lung granulomas | # Original granulomas | # Original granulomas for flow | Total CFU | Lung CFU | LN CFU   | Necropsy score | Total Pet Hot |
|--------|----------------|---------------------|-----------------|-------------------|------------------|-------------------|-----------------------|--------------------------------|-----------|----------|----------|----------------|---------------|
| 32719  | Early          | 4 weeks             | 19              | 12/17/19          | 1/13/20          | 12                | 12                    | 12                             | 5.61E+06  | 4.40E+06 | 1.21E+06 | 21             | 22449.25      |
| 32819  | Early          | 4 weeks             | 19              | 12/17/19          | 1/13/20          | 12                | 12                    | 12                             | 7.34E+05  | 5.96E+05 | 1.38E+05 | 20             | 8789.65       |
| 6219   | Mid            | 12 weeks            | 10              | 7/17/19           | 10/9/19          | 14                | 17                    | 14                             | 1.51E+05  | 1.11E+05 | 4.05E+04 | 27             | 16627.7       |
| 6319   | Mid            | 12 weeks            | 10              | 7/17/19           | 10/7/19          | 14                | 5                     | 5                              | 3.73E+04  | 2.44E+04 | 1.29E+04 | 25             | 4467.49       |
| 6419   | Mid            | 12 weeks            | 10              | 7/17/19           | 10/9/19          | 19                | 12                    | 12                             | 2.98E+04  | 6.37E+03 | 2.34E+04 | 23             | 1253.85       |
| 6519   | Late           | 20 weeks            | 18              | 8/22/19           | 1/6/20           | 19                | 14                    | 12                             | 1.23E+04  | 1.18E+04 | 5.50E+02 | 16             | 620.61        |
| 6619   | Late           | 20 weeks            | 18              | 8/22/19           | 1/6/20           | 12                | 11                    | 11                             | 1.57E+04  | 4.15E+03 | 1.15E+04 | 23             | 2663.83       |
| 6819   | Late           | 20 weeks            | 18              | 8/22/19           | 1/8/20           | 14                | 11                    | 10                             | 2.90E+04  | 1.87E+04 | 1.03E+04 | 24             | 6167.06       |

Supplementary table 2: Granulomas used for flow cytometry analysis, Related to STAR Methods.

| Animal | Sample               | NX Time point (wks) | NX Time | Gentle macs processed | CFU/granuloma |
|--------|----------------------|---------------------|---------|-----------------------|---------------|
| 32819  | RLL 1 (GM)           | 4                   | Early   | Yes                   | 18600         |
| 32819  | RLL 2                | 4                   | Early   | No                    | 520           |
| 32819  | RLL 3 (GM)           | 4                   | Early   | Yes                   | 46200         |
| 32819  | RLL 7 (GM)           | 4                   | Early   | Yes                   | 3120          |
| 32819  | RLL 4                | 4                   | Early   | No                    | 30000         |
| 32819  | RL 5 (GM)            | 4                   | Early   | Yes                   | 5580          |
| 32819  | RLL 6 (GM)           | 4                   | Early   | Yes                   | 28800         |
| 32819  | RLL 8                | 4                   | Early   | No                    | 103950        |
| 32819  | RLL 9 (GM)           | 4                   | Early   | Yes                   | 276000        |
| 32819  | RLL 10 (GM)          | 4                   | Early   | Yes                   | 71400         |
| 32819  | RLL 11               | 4                   | Early   | No                    | 3360          |
| 32819  | RLL 13               | 4                   | Early   | No                    | 1880          |
| 32719  | LLL gr 12            | 4                   | Early   | No                    | 930000        |
| 32719  | LLL gr 2             | 4                   | Early   | No                    | 40950         |
| 32719  | LLL gr 3/4           | 4                   | Early   | No                    | 45500         |
| 32719  | LLL gr 6 (GM)        | 4                   | Early   | Yes                   | 762000        |
| 32719  | LLL gr 7 (GM)        | 4                   | Early   | Yes                   | 1512000       |
| 32719  | LLL gr 9             | 4                   | Early   | No                    | 91200         |
| 32719  | LLL gr 10 (GM)       | 4                   | Early   | Yes                   | 96000         |
| 32719  | LLL gr 13            | 4                   | Early   | No                    | 76800         |
| 32719  | LLL gr 14 (GM)       | 4                   | Early   | Yes                   | 480000        |
| 32719  | LLL gr 15 (GM)       | 4                   | Early   | Yes                   | 70200         |
| 32719  | LLL gr 16 (GM)       | 4                   | Early   | Yes                   | 135600        |
| 32719  | LLL gr 17 (GM)       | 4                   | Early   | Yes                   | 93000         |
| 6219   | RLL cluster 6        | 12                  | Mid     | No                    | 1900          |
| 6219   | RLL cluster 13       | 12                  | Mid     | No                    | 3750          |
| 6219   | RLL gran 1 (GM)      | 12                  | Mid     | Yes                   | 635           |
| 6219   | RLL gran 3 (GM)      | 12                  | Mid     | Yes                   | 1360          |
| 6219   | RLL gran 5 (GM)      | 12                  | Mid     | Yes                   | 875           |
| 6219   | RLL gran 9 (GM)      | 12                  | Mid     | Yes                   | 450           |
| 6219   | RLL gran 10 (GM)     | 12                  | Mid     | Yes                   | 605           |
| 6219   | RLL gran 11 (GM)     | 12                  | Mid     | Yes                   | 990           |
| 6219   | RLL gran 12 (GM)     | 12                  | Mid     | Yes                   | 650           |
| 6219   | RLL gran 14          | 12                  | Mid     | No                    | 975           |
| 6219   | RLL gran 16          | 12                  | Mid     | No                    | 900           |
| 6219   | RLL gran 17          | 12                  | Mid     | No                    | 960           |
| 6219   | RLL gran 19          | 12                  | Mid     | No                    | 400           |
| 6219   | RLL gran 22 (GM)     | 12                  | Mid     | Yes                   | 1355          |
| 6319   | RLL cluster 5/6      | 12                  | Mid     | No                    | 975           |
| 6319   | RLL gran 7 (GM)      | 12                  | Mid     | No                    | 7080          |
| 6319   | RLL gran 9 (GM)      | 12                  | Mid     | Yes                   | 6000          |
| 6319   | RLL gran 18 (GM)     | 12                  | Mid     | Yes                   | 0             |
| 6319   | RLL gran 19 (GM)     | 12                  | Mid     | Yes                   | 6150          |
| 6419   | LLL gran 1 (GM)      | 12                  | Mid     | Yes                   | 25            |
| 6419   | LLL gran 2           | 12                  | Mid     | No                    | 1325          |
| 6419   | LLL gran 3           | 12                  | Mid     | No                    | 700           |
| 6419   | LLL gran 4 (GM)      | 12                  | Mid     | Yes                   | 335           |
| 6419   | LLL gran 5 (GM)      | 12                  | Mid     | Yes                   | 120           |
| 6419   | LLL gran 6A          | 12                  | Mid     | No                    | 1980          |
| 6419   | LLL gran 7 (GM)      | 12                  | Mid     | Yes                   | 440           |
| 6419   | LLL gran 8           | 12                  | Mid     | No                    | 50            |
| 6419   | LLL gran 9 (GM)      | 12                  | Mid     | Yes                   | 115           |
| 6419   | LLL gran 11 (GM)     | 12                  | Mid     | Yes                   | 470           |
| 6419   | LLL gran 12          | 12                  | Mid     | No                    | 120           |
| 6419   | LLL gran E           | 12                  | Mid     | No                    | 80            |
| 6519   | RLL cluster 12       | 20                  | Late    | No                    | 560           |
| 6519   | RLL gran H           | 20                  | Late    | No                    | 50            |
| 6519   | RLL gran 1           | 20                  | Late    | No                    | 10            |
| 6519   | RLL gran 3 (GM)      | 20                  | Late    | Yes                   | 870           |
| 6519   | RLL gran 4 (GM)      | 20                  | Late    | Yes                   | 6030          |
| 6519   | RLL gran 5 (GM)      | 20                  | Late    | Yes                   | 1105          |
| 6519   | RLL gran 9 (GM)      | 20                  | Late    | Yes                   | 750           |
| 6519   | RLL gran 13 (GM)     | 20                  | Late    | Yes                   | 975           |
| 6519   | RLL gran 14          | 20                  | Late    | No                    | 0             |
| 6519   | RLL gran 16 (GM)     | 20                  | Late    | Yes                   | 180           |
| 6519   | RLL gran 17 (GM)     | 20                  | Late    | Yes                   | 300           |
| 6519   | RLL gran 20          | 20                  | Late    | No                    | 0             |
| 6619   | LLL cluster 2        | 20                  | Late    | No                    | 450           |
| 6619   | LLL gran 1 (GM)      | 20                  | Late    | Yes                   | 240           |
| 6619   | LLL gran 3           | 20                  | Late    | No                    | 850           |
| 6619   | LLL gran 4 (GM)      | 20                  | Late    | Yes                   | 320           |
| 6619   | LLL gran 5           | 20                  | Late    | No                    | 10            |
| 6619   | LLL gran 6           | 20                  | Late    | No                    | 75            |
| 6619   | LLL gran 7 old (GM)  | 20                  | Late    | Yes                   | 175           |
| 6619   | LLL gran 8 (GM)      | 20                  | Late    | Yes                   | 240           |
| 6619   | LLL gran 9 old (GM)  | 20                  | Late    | Yes                   | 1183          |
| 6619   | LLL gran 10 (GM)     | 20                  | Late    | Yes                   | 180           |
| 6619   | LLL gran 11 old (GM) | 20                  | Late    | Yes                   | 425           |
| 6819   | LLL gran 1           | 20                  | Late    | No                    | 400           |
| 6819   | LLL gran 5 (GM)      | 20                  | Late    | Yes                   | 5285          |
| 6819   | LLL gran 7 (GM)      | 20                  | Late    | Yes                   | 2280          |
| 6819   | LLL gran 8 (GM)      | 20                  | Late    | Yes                   | 930           |
| 6819   | LLL gran 9 (GM)      | 20                  | Late    | Yes                   | 1015          |
| 6819   | LLL gran 10          | 20                  | Late    | No                    | 100           |
| 6819   | LLL gran 12 (GM)     | 20                  | Late    | Yes                   | 720           |
| 6819   | LLL gran 14 (GM)     | 20                  | Late    | Yes                   | 1650          |
| 6819   | LLL gran 15 (GM)     | 20                  | Late    | Yes                   | 2940          |
| 6819   | LLL gran 18          | 20                  | Late    | No                    | 260           |

**Supplementary table 3: List of antibodies used to identify cellular populations, Related to STAR Methods**

| Target         | Clone      | Company                    | Catalog #       | RRID             | Method |
|----------------|------------|----------------------------|-----------------|------------------|--------|
| CD69           | TP1.55.3   | Beckman Coulter            | 6607110         | RRID:AB_1575978  | Flow   |
| ROR $\alpha$   | NR1F1      | R&D                        | IC8924P-100     |                  | Flow   |
| CD163          | GHI/61     | BioLegend                  | 333614          | RRID:AB_2562641  | Flow   |
| Foxp3          | PCH101     | Thermo Fisher              | 45-4776-42      | RRID:AB_10854725 | Flow   |
| ROR $\gamma$ T | AFKJS-9    | Thermo Fisher              | 46-6988-80      | RRID:AB_2802282  | Flow   |
| T-bet          | 4B10       | BioLegend                  | 644812          | RRID:AB_2200540  | Flow   |
| IFN- $\gamma$  | B27        | BioLegend                  | 562974          | RRID:AB_2737926  | Flow   |
| CD4            | L200       | BD                         | 563094          | RRID:AB_2738001  | Flow   |
| CD11c          | 3.9        | BioLegend                  | 301628          | RRID:AB_11203895 | Flow   |
| PD-1 (CD279)   | EH12.1     | BD                         | 566175          | RRID:AB_2739572  | Flow   |
| IL-10          | JES3-9D7   | eBioscience                | 48-7108-42      | RRID:AB_10548941 | Flow   |
| TNF            | Mab11      | BioLegend                  | 563418          |                  | Flow   |
| CD3            | SP34-2     | BD                         | 624072          |                  | Flow   |
| GATA3          | 16E10A23   | BioLegend                  | 653806          | RRID:AB_2562725  | Flow   |
| CD20           | 2H7        | BioLegend                  | 302318          | RRID:AB_493229   | Flow   |
| CD8            | RPA-T8     | BD                         | 563795          | RRID:AB_2722501  | Flow   |
| CD11b          | ICRF44     | BD                         | 741357          | RRID:AB_2870858  | Flow   |
| ROR $\alpha$   | polyclonal | abcam                      | ab60134         | RRID:AB_945289   | IHC    |
| GATA3          | EPR16651   | abcam                      | ab199428        | RRID:AB_2819013  | IHC    |
| T-bet          | D6N8B      | Cell Signaling Technology  | 13232           | RRID:AB_2616022  | IHC    |
| Foxp3          | 236A/E7    | ebioscience                | 14-4777-82      | RRID:AB_467556   | IHC    |
| CD163          | 10D6       | Neomarkers (thermo fisher) | MS-1103-S1      | RRID:AB_64140    | IHC    |
| CD11c          | 5D11       | Novocastra- Leica          | NCL-L-CD11c-563 | RRID:AB_563490   | IHC    |
| CD3            | CD3-12     | abcam                      | ab11089         | RRID:AB_2889189  | IHC    |
| Granzyme B     | GrB-7      | Dako                       | M7235           | RRID:AB_2114697  | IHC    |
| CD8 $\alpha$   | D8A8Y      | CST                        | 85336S          |                  | IHC    |
| CD3            | polyclonal | Dako                       | A0452           | RRID:AB_2335677  | IHC    |

**Supplementary table 4: Granulomas used for IHC and immunofluorescence,  
designated by figure, Related to STAR Methods**

| Animal ID | Sample name   | NX timing | CFU     | Figure 1 | Figure 5 | Supplementary Figure 2  | Supplementary Figure 6 |
|-----------|---------------|-----------|---------|----------|----------|-------------------------|------------------------|
| 17313     | LLL gran 25A  | Early     | 1.2E+04 | D        |          |                         |                        |
| 9814      | RLL gran 12   | Mid       | 4.6E+02 | D        | A        |                         | Foxp3                  |
| 20512     | RLL gran 1    | Late      | 0.0E+00 | D        |          |                         |                        |
| 16213     | RLL gran 16   | Late      | 0.0E+00 |          |          |                         | GATA3                  |
| 11114     | RLL gran 5    | Early     | 5.0E+04 |          |          |                         | ROR $\alpha$           |
| 15312     | Access gran 1 | Late      | 2.4E+02 |          |          |                         | Granzyme B             |
| 6619      | LLL gran 9    | Late      | 1.2E+03 |          |          | Fibrocalcific           |                        |
| 6619      | LLL gran 7    | Late      | 1.8E+02 |          |          | Granuloma scar          |                        |
| 13118     | RLL gran 7    | Early     | 3.5E+04 |          |          | Early evolving necrotic |                        |
| 6219      | RLL gran 5    | Mid       | 8.8E+02 |          |          | Classic necrotic        |                        |
| 9814      | RLL gran 28   | Mid       | 9.0E+02 |          |          | Early colleganization   |                        |
| 9714      | RLL gran 27   | Mid       | 5.4E+02 |          | B        |                         |                        |
